# Supplementary material for: The Role of Objectively Measured, Altered Physical Activity Patterns for Body Mass Index Change during Inpatient Treatment in Female Patients with Anorexia Nervosa
Source: J Clin Med. 2018 Sep 18;7(9):289. doi: 10.3390/jcm7090289 (PMC6162412; doi:10.3390/jcm7090289)
Supplement: Supplementary file 1 [file jcm-07-00289-s001.pdf]

**Table S1.** Medical details, comorbidities, and medication of study patients and the healthy controls.

|                                        | Anorexia nervosa (n=50) | Controls (n=30) | p      |
|----------------------------------------|-------------------------|-----------------|--------|
| <b>Medical details</b>                 |                         |                 |        |
| <b>Length of inpatient stay (days)</b> | 32 (26 / 63)            | NA              |        |
| <b>Anorexia nervosa subtype</b>        |                         |                 |        |
| restrictive                            | 24 (48%)                | NA              |        |
| purging                                | 13 (26%)                | NA              |        |
| atypical                               | 13 (26%)                | NA              |        |
| <b>Comorbidities</b>                   |                         |                 |        |
| Missing data                           | 0 (0%)                  | 6 (20%)         |        |
| Pericardial effusion                   | 13 (26%)                | 0 (0%)          | <0.001 |
| Episode of depression (moderately)     | 13 (26%)                | 0 (0%)          | <0.001 |
| Ascites                                | 6 (12%)                 | 0 (0%)          | 0.079  |
| Selfharming behaviour                  | 3 (6%)                  | 0 (0%)          | 0.288  |
| Osteopenia                             | 5 (10%)                 | 0 (0%)          | 0.151  |
| Iron deficiency anaemia                | 1 (2%)                  | 1 (3%)          | 1.000  |
| Hashimoto's disease                    | 1 (2%)                  | 1 (3%)          | 1.000  |
| Atopic dermatitis                      | 1 (2%)                  | 1 (3%)          | 1.000  |
| Hip dysplasia                          | 0 (0%)                  | 1 (3%)          | 0.375  |
| No comorbidities                       | 2 (4%)                  | 20 (67%)        | <0.001 |
| <b>Medication on admission</b>         |                         |                 |        |
| Missing data                           | 1 (2%)                  | 0 (0%)          |        |
| Oral contraceptives                    | 13 (27%)                | 15 (50%)        | 0.052  |
| Other contraceptives                   | 0 (0%)                  | 2 (7%)          | 0.141  |
| Protein energy drink                   | 1 (2%)                  | 0 (0%)          | 1.000  |
| Iron products                          | 3 (6%)                  | 0 (0%)          | 0.284  |
| Psychopharmacological treatment        | 8 (16%)                 | 0 (0%)          | 0.021  |
| L-thyroxine                            | 2 (4%)                  | 2 (7%)          | 0.632  |
| No medication                          | 17 (35%)                | 11 (37%)        | 1.000  |
| <b>Medication at discharge</b>         |                         |                 |        |
| Missing data                           | 3 (6%)                  | NA              |        |
| Oral contraceptives                    | 12 (26%)                | NA              |        |
| Other contraceptives                   | 0 (0%)                  | NA              |        |
| Protein energy drink                   | 16 (34%)                | NA              |        |
| Iron products                          | 4 (9%)                  | NA              |        |
| Psychopharmacological treatment        | 18 (38%)                | NA              |        |
| L-thyroxine                            | 0 (0%)                  | NA              |        |
| No medication                          | 6 (13%)                 | NA              |        |

Data are expressed as mean  $\pm$  SD (range) or absolute frequency (relative frequency %). NA, not applicable.
